# Supplementary material for: Differential Impact of Social Isolation and Space Radiation on Behavior and Motor Learning in Rats
Source: MDPI journal article supplement (doi:10.3390/life13030826), 2023-03-18
Supplement: s1 [file s1]

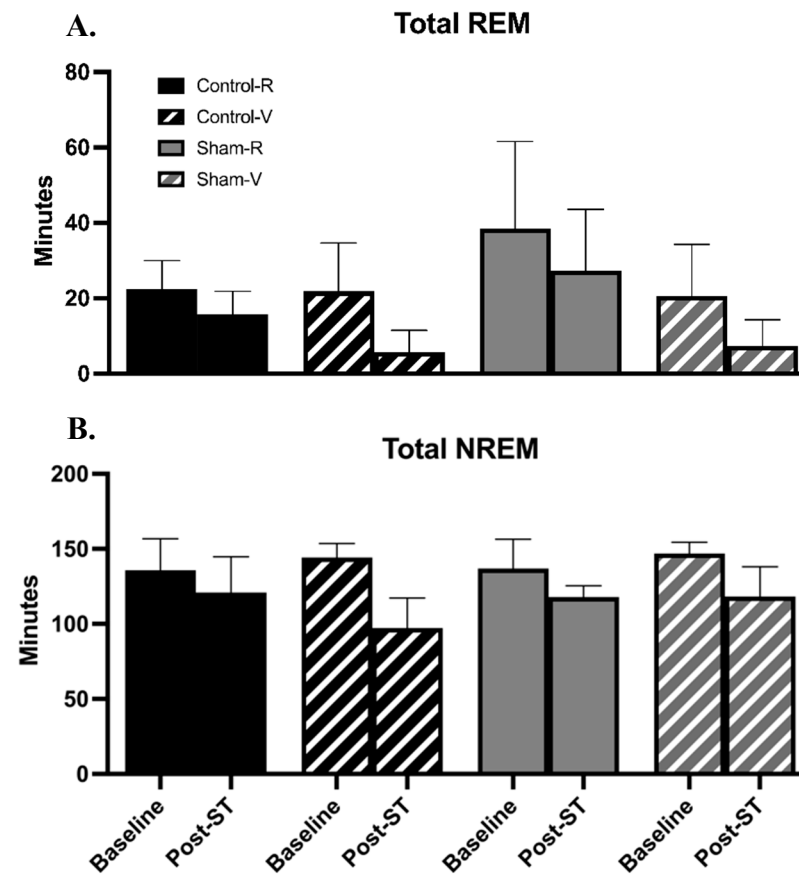

**Supplementary Figure S1: Sleep Does Not Differ between Control and Sham Groups.** Graphs plotting the first 4 hrs of sleep recording during baseline and after shock training (Post-ST) between Control and Sham resilient (R) and vulnerable (V) animals for **A)** REM  $\pm$  SEM and **B)** NREM  $\pm$  SEM. Sham animals traveled with SR treated groups as a control to account for any potential negative effects caused by the transit required for the experiment. Control animals never traveled and remained in their housing rooms on campus.

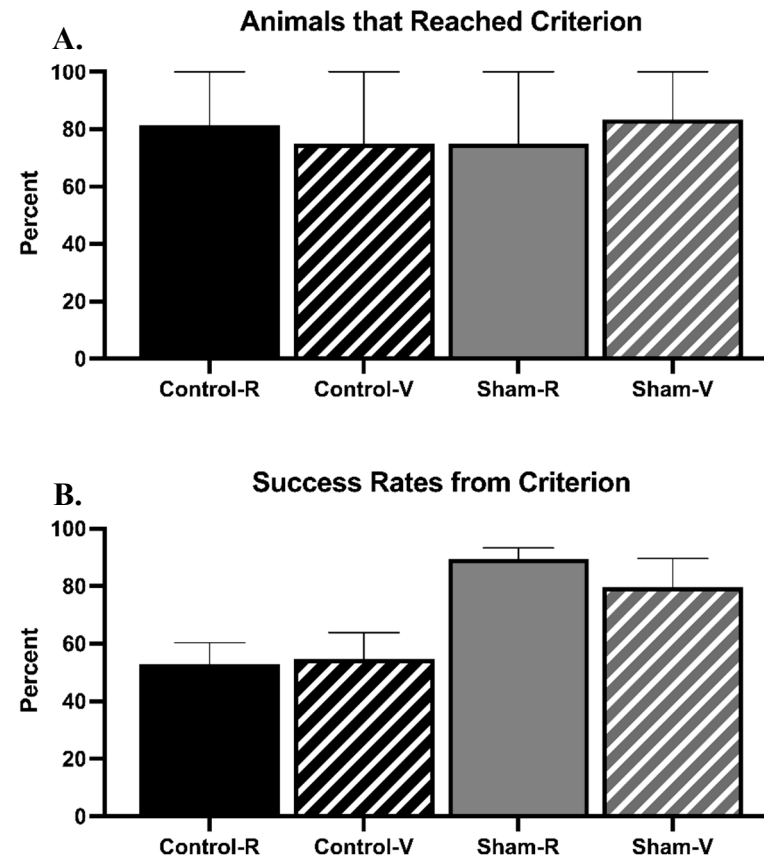

**Supplementary Figure S2: Balance Beam Performance Does Not Differ between Control and Sham Groups.** Graphs plotting differences between resilient (R) and vulnerable (V) phenotypes within each treatment group for **A)** the percent of animals  $\pm$  SEM that reached criterion (position 4) and **B)** the percent success rates of animals  $\pm$  SEM from criterion (position 4).

**Supplementary Table S1: Resilient Animals Exhibit More Off-Task Behaviors Compared to Vulnerable Animals.** Table showing the percentage between resilient and vulnerable phenotypes of the total behaviors exhibited during the learning period (LP) and post-learning period (PLP) within each treatment group during the balance beam task.

|         | LP        |            | PLP       |            |
|---------|-----------|------------|-----------|------------|
|         | Resilient | Vulnerable | Resilient | Vulnerable |
| Control | 82.99%    | 17.01%     | 64.53%    | 35.47%     |
| SI      | 57.14%    | 42.86%     | 71.40%    | 28.60%     |
| SR      | 93.08%    | 6.92%      | 85.59%    | 14.41%     |
| DFS     | 75.68%    | 24.32%     | 84.83%    | 15.17%     |

**Supplementary Table S2: Summary of Results.** Table showing a summary of the overall results between resilient and vulnerable phenotypes within each treatment group during the balance beam task.

|         | Total Instances of<br>Disequilibrium During BB<br>Task |            | Total Instances of Fear<br>Behavior During BB Task |            | Number of Times an<br>Animal Neglected to<br>Attempt a Trial<br>During BB Task |            | Percent of Animals that<br>Reached Criterion |            |
|---------|--------------------------------------------------------|------------|----------------------------------------------------|------------|--------------------------------------------------------------------------------|------------|----------------------------------------------|------------|
|         | Resilient                                              | Vulnerable | Resilient                                          | Vulnerable | Resilient                                                                      | Vulnerable | Resilient                                    | Vulnerable |
| Control | 0                                                      | 0          | 0                                                  | 0          | 0                                                                              | 0          | 80%                                          | 80%        |
| SI      | 75                                                     | 13         | 0                                                  | 0          | 0                                                                              | 0          | 90%                                          | 90%        |
| SR      | 277                                                    | 20         | 7                                                  | 18         | 114                                                                            | 26         | 75%                                          | 50%        |
| DFS     | 230                                                    | 53         | 13                                                 | 2          | 70                                                                             | 2          | 60%                                          | 78%        |
